# Supplementary material for: Amino acid hydrogen oxalate quasiracemates – hydrocarbon side chains
Source: Royal Society of Chemistry journal article supplement (doi:10.1039/d1ce01213d), 2021-01-01
Supplement: d1ce01213d1.pdf [file d1ce01213d1.pdf]

Electronic supplementary information for:

## **Amino acid hydrogen oxalate quasiracemates – hydrocarbon side chains**

Russell G. Wells, Katriel D. Sahlstrom, Franklin I. Ekelem, and Kraig A. Wheeler

*Department of Chemistry, Whitworth University, Spokane, WA 99251, USA. E-mail: kraigwheeler@whitworth.edu; Tel: +1 509 777 4943*

### **Electronic Supplementary Information**

| <b>Table of Contents</b>                                                      | <b>Page</b> |
|-------------------------------------------------------------------------------|-------------|
| <b>S1</b> – Crystal Growth Experiments                                        | 2           |
| <b>S2</b> – X-ray Crystallography                                             | 2-7         |
| <b>S3</b> – DL-NLe-HOx Crystal Photograph and View of Crystal Structure       | 7           |
| <b>S4</b> – Conformational and Symmetry Assessments                           | 7-8         |
| <b>S5</b> – Hydrogen Oxalate Cambridge Crystallographic Database (CSD) Search | 9-13        |

## S1. Crystal Growth Experiments

**General Considerations.** All chemicals and solvents were purchased from the MilliporeSigma, TCI America, or Acros Chemicals and used as received without further purification unless stated otherwise.

**Crystal Growth of Racemates DL-Ile·HOx, DL-Leu·HOx, DL-Nle·HOx, DL-Nva·HOx.** To a 2-dram vial was added a 1:1:2 molar ratio of the enantiomers (40 – 60 mg total) and oxalic acid dihydrate. The contents of the vial were dissolved in 2 mL of distilled water with the aid of agitation and heat (*ca.* 60 °C) and allowed to crystallize via slow evaporation to give needle-like crystals after several days.

**Crystal Growth of Quasiracemates L-Ile-D-Leu·2HOx, L-Ile-D-Nva·2HOx, L-Nva-D-Leu·2HOx, L-Nle-D-Leu·2HOx.** To a 2-dram vial was added a 1:1:2 molar ratio of the quasienantiomers (40 – 60 mg total) and oxalic acid dihydrate. The contents of the vial were dissolved in 2 mL of distilled water with the aid of agitation and heat (*ca.* 60 °C) and allowed to crystallize via slow evaporation at room temperature to give needle-like crystals after several days.

## S2. X-ray Crystallography

Crystallographic details for each amino acid racemic and quasiracemic compound are summarized in Table S1. X-ray data were collected on a Bruker Venture D8 diffractometer diffractometer using phi and omega scans with graphite monochromatic Cu  $K\alpha$  ( $\lambda = 1.54178 \text{ \AA}$ ) radiation. Data sets were corrected for Lorentz and polarization effects as well as absorption. The criterion for observed reflections is  $I > 2\sigma(I)$ . Lattice parameters were determined from least-squares analysis and reflection data. Empirical absorption corrections were applied using SADABS.<sup>1</sup> Structures were solved by direct methods and refined by full-matrix least-squares analysis on  $F^2$  using X-SEED<sup>2</sup> equipped with SHELXT<sup>3</sup>. All non-hydrogen atoms were refined anisotropically by full-matrix least-squares on  $F^2$  using the SHELXL<sup>4</sup> program. H atoms attached to nitrogen or oxygen were located in difference Fourier synthesis and refined isotropically with independent O/N-H distances or restrained to 0.85(2) Å. The remaining H atoms were included in idealized geometric positions with  $U_{iso}=1.2U_{eq}$  of the atom to which they were attached ( $U_{iso}=1.5U_{eq}$  for methyl groups). Molecular configurations were compared to both the known chirality of the amino acid and estimated Flack parameters<sup>5</sup> and where applicable, atomic coordinates were inverted to achieve correct structural configurations. Hydrogen bond parameters are given in Table S2.

- 
1. SADABS-2016/2 (Bruker AXS). L. Krause, R. Herbst-Irmer, G. M. Sheldrick and D. Stalke, *J. Appl. Cryst.*, 2015, **48**, 3-10.
  2. L. J. Barbour, *J. Appl. Cryst.*, 2020, **53**, 1141.
  3. G. M. Sheldrick, *Acta Cryst.*, 2015, **A71**, 3-8.
  4. G. M. Sheldrick, *Acta Cryst.*, 2015, **C71**, 3-8.
  5. H. D. Flack, *Acta Crystallogr.*, 1983, **39**, 876-881.

Table S1. Crystallographic Data for Hydrogen Oxalate Amino Acids.

|                                                                            | DL-Ile·HOx                                       | DL-Leu·HOx                                     | DL-Nle·HOx                                     | DL-Nva·HOx                                     |
|----------------------------------------------------------------------------|--------------------------------------------------|------------------------------------------------|------------------------------------------------|------------------------------------------------|
| <b>Crystal data</b>                                                        |                                                  |                                                |                                                |                                                |
| CCDC deposit no.                                                           | 2017245                                          | 2017256                                        | 2105696                                        | 2017249                                        |
| Empirical formula                                                          | C <sub>8</sub> H <sub>15</sub> NO <sub>6</sub>   | C <sub>8</sub> H <sub>15</sub> NO <sub>6</sub> | C <sub>8</sub> H <sub>15</sub> NO <sub>6</sub> | C <sub>7</sub> H <sub>13</sub> NO <sub>6</sub> |
| Crystal System,<br>space group                                             | Monoclinic<br><i>P</i> 2 <sub>1</sub> / <i>n</i> | Triclinic<br><i>P</i> -1                       | Triclinic<br><i>P</i> -1                       | Triclinic<br><i>P</i> -1                       |
| <i>M<sub>r</sub></i>                                                       | 221.21                                           | 221.21                                         | 221.21                                         | 207.18                                         |
| <i>a</i> , Å                                                               | 9.7133(5)                                        | 5.6792(4)                                      | 5.6270(5)                                      | 5.7278(2)                                      |
| <i>b</i> , Å                                                               | 5.7496(3)                                        | 9.5687(7)                                      | 9.4327(9)                                      | 9.4026(3)                                      |
| <i>c</i> , Å                                                               | 19.3839(12)                                      | 9.9416(8)                                      | 10.4431(10)                                    | 9.8028(2)                                      |
| $\alpha$ , deg                                                             | 90                                               | 84.722(3)                                      | 88.922(4)                                      | 77.211(2)                                      |
| $\beta$ , deg                                                              | 104.238(2)                                       | 74.876(3)                                      | 75.976(4)                                      | 78.253(2)                                      |
| $\gamma$ , deg                                                             | 90                                               | 82.793(3)                                      | 83.757(4)                                      | 78.876(2)                                      |
| <i>V</i> , (Å <sup>3</sup> )                                               | 1049.29(10)                                      | 516.43(7)                                      | 534.57(9)                                      | 497.98(3)                                      |
| <i>Z</i> , <i>Z'</i>                                                       | 4, 1                                             | 2, 1                                           | 2, 1                                           | 2, 1                                           |
| <i>D<sub>calc</sub></i> (g cm <sup>-3</sup> )                              | 1.400                                            | 1.423                                          | 1.374                                          | 1.382                                          |
| $\mu$ (mm <sup>-1</sup> ), rad.<br>type                                    | 1.039                                            | 1.056                                          | 1.020                                          | 1.058                                          |
| <i>F<sub>000</sub></i>                                                     | 472                                              | 236                                            | 236                                            | 220                                            |
| temp (K)                                                                   | 100(2)                                           | 100(2)                                         | 100(2)                                         | 100(2)                                         |
| Crystal form,<br>color                                                     | needle, colorless                                | needle, colorless                              | needle, colorless                              | needle, colorless                              |
| Crystal size, mm                                                           | 0.095x0.112x0.219                                | 0.063x0.109x0.228                              | 0.028x0.122x0.401                              | 0.052x0.131x0.197                              |
| <b>Data collection</b>                                                     |                                                  |                                                |                                                |                                                |
| Diffractometer                                                             | Bruker D8 Venture CCD                            | Bruker D8 Venture CCD                          | Bruker D8 Venture CCD                          | Bruker D8 Venture CCD                          |
| <i>T<sub>min</sub></i> / <i>T<sub>max</sub></i>                            | 0.6928/0.7536                                    | 0.6190/0.7531                                  | 0.5918/0.7530                                  | 0.6102/0.7530                                  |
| No. of refls.<br>(meas., uniq.,<br>and obs.)                               | 15413/2043/2008                                  | 10477/1874/1778                                | 9427/1944/1788                                 | 5325/1802/1545                                 |
| <i>R<sub>int</sub></i>                                                     | 0.0258                                           | 0.0393                                         | 0.0572                                         | 0.0288                                         |
| $\vartheta_{\max}$ (°)                                                     | 72.284                                           | 68.359                                         | 68.281                                         | 68.282                                         |
| <b>Refinement</b>                                                          |                                                  |                                                |                                                |                                                |
| <i>R</i> / <i>R</i> <sup>2</sup> <sub><math>\omega</math></sub> (obs data) | 0.0295/0.0765                                    | 0.0366/0.0958                                  | 0.0476/0.1258                                  | 0.0340/0.0825                                  |
| <i>R</i> / <i>R</i> <sup>2</sup> <sub><math>\omega</math></sub> (all data) | 0.0298/0.0768                                    | 0.0381/0.0978                                  | 0.0506/0.1297                                  | 0.0416/0.0870                                  |
| <i>S</i>                                                                   | 1.077                                            | 1.071                                          | 1.075                                          | 1.058                                          |
| No. of refls.                                                              | 2043                                             | 1874                                           | 1944                                           | 1802                                           |
| No. of<br>parameters                                                       | 153                                              | 153                                            | 194                                            | 143                                            |
| $\Delta\rho_{\max/\min}$ (e·Å <sup>-3</sup> )                              | 0.310/-0.205                                     | 0.305/-0.234                                   | 0.764/-0.227                                   | 0.226/-0.206                                   |
| <i>flack</i>                                                               | -                                                | -                                              | -                                              | -                                              |

Table S1. Crystallographic Data for Hydrogen Oxalate Amino Acids. (Continued)

|                                                          | L-Ile·D-Leu·2HOx                                               | L-Ile·D-Nva·2HOx                                               | L-Nva·D-Leu·2HOx                                               | L-Nle·D-Leu·2HOx                                               |
|----------------------------------------------------------|----------------------------------------------------------------|----------------------------------------------------------------|----------------------------------------------------------------|----------------------------------------------------------------|
| Crystal data                                             |                                                                |                                                                |                                                                |                                                                |
| CCDC deposit no.                                         | 2017253                                                        | 2017247                                                        | 2017254                                                        | 2017255                                                        |
| Empirical formula                                        | C <sub>16</sub> H <sub>30</sub> N <sub>2</sub> O <sub>12</sub> | C <sub>15</sub> H <sub>28</sub> N <sub>2</sub> O <sub>12</sub> | C <sub>15</sub> H <sub>28</sub> N <sub>2</sub> O <sub>12</sub> | C <sub>16</sub> H <sub>30</sub> N <sub>2</sub> O <sub>12</sub> |
| Crystal System, space group                              | Triclinic<br><i>P</i> 1                                        | Triclinic<br><i>P</i> 1                                        | Triclinic<br><i>P</i> 1                                        | Triclinic<br><i>P</i> 1                                        |
| <i>M<sub>r</sub></i>                                     | 442.42                                                         | 428.39                                                         | 428.39                                                         | 442.42                                                         |
| <i>a</i> , Å                                             | 5.6883(2)                                                      | 5.7100(4)                                                      | 5.6561(5)                                                      | 5.6629(5)                                                      |
| <i>b</i> , Å                                             | 9.7485(3)                                                      | 9.5809(7)                                                      | 9.5934(8)                                                      | 9.5020(9)                                                      |
| <i>c</i> , Å                                             | 9.8768(4)                                                      | 9.8621(7)                                                      | 9.7572(9)                                                      | 10.2123(10)                                                    |
| <i>α</i> , deg                                           | 81.291(2)                                                      | 74.666(3)                                                      | 85.735(3)                                                      | 95.275(6)                                                      |
| <i>β</i> , deg                                           | 74.807(2)                                                      | 79.160(3)                                                      | 75.315(3)                                                      | 101.163(5)                                                     |
| <i>γ</i> , deg                                           | 81.290(2)                                                      | 79.281(3)                                                      | 82.514(3)                                                      | 97.232(5)                                                      |
| <i>V</i> , (Å <sup>3</sup> )                             | 518.86(3)                                                      | 505.72(6)                                                      | 507.31(8)                                                      | 530.99(9)                                                      |
| <i>Z</i> , <i>Z'</i>                                     | 1, 1                                                           | 1, 1                                                           | 1, 1                                                           | 1, 1                                                           |
| <i>D<sub>calc</sub></i> (g cm <sup>-3</sup> )            | 1.416                                                          | 1.407                                                          | 1.402                                                          | 1.384                                                          |
| <i>μ</i> (mm <sup>-1</sup> ), rad. type                  | 1.051                                                          | 1.060                                                          | 1.057                                                          | 1.027                                                          |
| <i>F<sub>000</sub></i>                                   | 236                                                            | 228                                                            | 228                                                            | 236                                                            |
| temp (K)                                                 | 100(2)                                                         | 100(2)                                                         | 100(2)                                                         | 100(2)                                                         |
| Crystal form, color                                      | needle, colorless                                              | needle, colorless                                              | needle, colorless                                              | needle, colorless                                              |
| Crystal size, mm                                         | 0.025x0.084x0.219                                              | 0.356x0.055x0.043                                              | 0.033x0.058x0.324                                              | 0.326x0.111x0.068                                              |
| Data collection                                          |                                                                |                                                                |                                                                |                                                                |
| Diffractometer                                           | Bruker D8 Venture CCD                                          |
| <i>T<sub>min</sub></i> / <i>T<sub>max</sub></i>          | 0.6825/0.7531                                                  | 0.6201/0.7535                                                  | 0.467620/0.753579                                              | 0.5865/0.7531                                                  |
| No. of refls. (meas., uniq., and obs.)                   | 11263/3656/3392                                                | 12329/3780/3501                                                | 1772/1772/1687                                                 | 7892/3399/3072                                                 |
| <i>R<sub>int</sub></i>                                   | 0.0395                                                         | 0.0407                                                         | 0.01643                                                        | 0.0547                                                         |
| <i>θ<sub>max</sub></i> (°)                               | 68.242                                                         | 72.193                                                         | 68.184                                                         | 68.591                                                         |
| Refinement                                               |                                                                |                                                                |                                                                |                                                                |
| <i>R</i> / <i>R</i> <sup>2</sup> <sub>ω</sub> (obs data) | 0.0322/0.0734                                                  | 0.0304/0.0783                                                  | 0.0669/0.1715                                                  | 0.0497/0.1265                                                  |
| <i>R</i> / <i>R</i> <sup>2</sup> <sub>ω</sub> (all data) | 0.0366/0.0761                                                  | 0.0333/0.0803                                                  | 0.0700/0.1741                                                  | 0.0560/0.1322                                                  |
| <i>S</i>                                                 | 1.069                                                          | 1.085                                                          | 1.101                                                          | 1.060                                                          |
| No. of refls.                                            | 3656                                                           | 3780                                                           | 1772                                                           | 3399                                                           |
| No. of parameters                                        | 305                                                            | 295                                                            | 280                                                            | 304                                                            |
| <i>Δρ<sub>max/min</sub></i> (e·Å <sup>-3</sup> )         | 0.232/ -0.184                                                  | 0.253/-0.155                                                   | 0.506/-0.344                                                   | 0.392/-0.244                                                   |
| <i>flack</i>                                             | 0.12(12)                                                       | 0.07(14)                                                       | 0.5(10)                                                        | -0.23(19)                                                      |

Table S2. Hydrogen Bond Parameters for Racemic and Quasiracemic Hydrogen Oxalate Amino Acids.

| Compound   | D–H...A                   | D–H (Å)   | H...A (Å) | D...A (Å)  | D–H...A (°) |
|------------|---------------------------|-----------|-----------|------------|-------------|
| DL-Ile·HOx | O3–H3...O5 <sup>i</sup>   | 0.906(16) | 1.689(16) | 2.5920(10) | 174.9(14)   |
|            | N1–H1A...O6 <sup>ii</sup> | 0.916(15) | 1.931(15) | 2.8278(12) | 165.6(13)   |
|            | N1–H1C...O5 <sup>iv</sup> | 0.914(15) | 1.996(15) | 2.8509(11) | 155.0(13)   |
|            | N1–H1B...O2 <sup>ii</sup> | 0.899(15) | 1.985(15) | 2.8542(12) | 162.3(13)   |
|            | O1–H1...O6 <sup>iii</sup> | 0.865(16) | 1.724(17) | 2.5736(10) | 166.7(15)   |

Symmetry codes: (i)  $x, y-1, z$ ; (ii)  $1-x, -y, 1-z$ ; (iii)  $x-1/2, 1/2-y, z-1/2$ ; (iv)  $x, y, z$ 

| Compound   | D–H...A                    | D–H (Å)   | H...A (Å) | D...A (Å)  | D–H...A (°) |
|------------|----------------------------|-----------|-----------|------------|-------------|
| DL-Leu·HOx | O1–H1...O6 <sup>v</sup>    | 0.93(2)   | 1.66(2)   | 2.5773(13) | 165.6(17)   |
|            | O3–H3...O5 <sup>i</sup>    | 0.917(19) | 1.699(19) | 2.6132(13) | 174.8(16)   |
|            | N1–H1A...O2 <sup>ii</sup>  | 0.912(18) | 1.940(18) | 2.8127(15) | 159.6(15)   |
|            | N1–H1B...O5 <sup>iii</sup> | 0.938(18) | 1.897(18) | 2.8164(15) | 166.1(15)   |
|            | N1–H1C...O6 <sup>iv</sup>  | 0.911(18) | 1.940(19) | 2.8504(15) | 176.8(15)   |

Symmetry codes: (i)  $x-1, y, z$ ; (ii)  $-x, 1-y, 2-z$ ; (iii)  $x-1, y+1, z$ ; (iv)  $1-x, 1-y, 2-z$ ; (v)  $x, y, z$ 

| Compound   | D–H...A                     | D–H (Å) | H...A (Å) | D...A (Å)  | D–H...A (°) |
|------------|-----------------------------|---------|-----------|------------|-------------|
| DL-Nle·HOx | O6–H6...O4 <sup>i</sup>     | 0.84(2) | 1.74(2)   | 2.5820(15) | 176(2)      |
|            | O1a–H1...O3 <sup>ii</sup>   | 0.79(2) | 1.81(3)   | 2.5736(18) | 164(2)      |
|            | O1A–H1...O3 <sup>iii</sup>  | 0.98(3) | 1.81(3)   | 2.687(17)  | 147(2)      |
|            | N1a–H1A...O4 <sup>iv</sup>  | 0.91(3) | 1.91(3)   | 2.809(2)   | 168(2)      |
|            | N1a–H1B...O2 <sup>vii</sup> | 0.82(3) | 2.01(3)   | 2.768(2)   | 152(2)      |
|            | N1a–H1C...O3 <sup>vii</sup> | 0.94(3) | 1.97(3)   | 2.907(2)   | 175(2)      |
|            | N1A–H1A1...O4 <sup>ii</sup> | 0.91    | 1.90      | 2.64(2)    | 136.8       |
|            | N1A–H1A3...O5 <sup>vi</sup> | 0.91    | 2.05      | 2.92(3)    | 159.4       |

Symmetry codes: (i)  $x-1, y, z$ ; (ii)  $x-1, y+1, z$ ; (iii)  $1-x, 1-y, -z$ ; (iv)  $2-x, 1-y, -z$ ; (v)  $x-1, y+1, z$ ; (vi)  $x, y+1, z$ ; (vii)  $x, y, z$ 

| Compound   | D–H...A                    | D–H (Å) | H...A (Å) | D...A (Å)  | D–H...A (°) |
|------------|----------------------------|---------|-----------|------------|-------------|
| DL-Nva·HOx | O1–H1...O6 <sup>v</sup>    | 0.88(2) | 1.73(2)   | 2.5771(14) | 161.6(19)   |
|            | O3–H3...O5 <sup>i</sup>    | 0.89(2) | 1.75(2)   | 2.6348(14) | 173.8(18)   |
|            | N1–H1A...O6 <sup>ii</sup>  | 0.92(2) | 1.95(2)   | 2.8529(17) | 166.4(16)   |
|            | N1–H1B...O2 <sup>iii</sup> | 0.93(2) | 1.94(2)   | 2.8408(16) | 161.9(17)   |
|            | N1–H1C...O5 <sup>iv</sup>  | 0.92(2) | 1.94(2)   | 2.8082(16) | 157.7(17)   |

Symmetry codes: (i)  $x-1, y, z$ ; (ii)  $1-x, 2-y, 1-z$ ; (iii)  $-x, 2-y, 1-z$ ; (iv)  $x-1, y, z+1$ ; (v)  $x, y, z$

| Compound                   | D–H...A                     | D–H (Å) | H...A (Å) | D...A (Å) | D–H...A (°) |
|----------------------------|-----------------------------|---------|-----------|-----------|-------------|
| L-Ile·D-Leu·2HOx           | O1–H1...O8 <sup>i</sup>     | 0.76(4) | 1.83(4)   | 2.571(3)  | 164(4)      |
|                            | O3–H3...O12 <sup>ii</sup>   | 1.00(4) | 1.58(5)   | 2.570(3)  | 172(4)      |
|                            | O5–H5...O7 <sup>iii</sup>   | 0.82(5) | 1.83(5)   | 2.639(3)  | 171(4)      |
|                            | O9–H9...O11 <sup>iv</sup>   | 0.99(4) | 1.61(4)   | 2.601(3)  | 172(4)      |
|                            | N1–H1B...O4 <sup>vii</sup>  | 0.87(4) | 1.99(4)   | 2.803(4)  | 155(4)      |
|                            | N1–H1C...O12 <sup>v</sup>   | 0.91(5) | 1.92(5)   | 2.828(4)  | 173(4)      |
|                            | N1–H1A...O7 <sup>vii</sup>  | 0.85(5) | 2.02(5)   | 2.849(4)  | 168(4)      |
|                            | N2–H2A...O11 <sup>vii</sup> | 0.93(5) | 1.94(5)   | 2.827(4)  | 158(4)      |
|                            | N2–H2C...O8 <sup>vi</sup>   | 0.92(5) | 1.93(5)   | 2.833(4)  | 169(4)      |
| N2–H2B...O2 <sup>vii</sup> | 0.88(5)                     | 2.04(5) | 2.833(4)  | 169(4)    |             |

Symmetry codes: (i) 1+x, y-1, z; (ii) x-1, 1+y, z; (iii) x-1, y, z; (iv) 1+x, y, z; (v) x, 1+y, z; (vi) x, y-1, z; (vii) x, y, z

| Compound                   | D–H...A                     | D–H (Å) | H...A (Å) | D...A (Å) | D–H...A (°) |
|----------------------------|-----------------------------|---------|-----------|-----------|-------------|
| L-Ile·D-Nva·2HOx           | O1–H1...O8 <sup>i</sup>     | 0.84(2) | 1.77(3)   | 2.550(4)  | 153(5)      |
|                            | O3–H3...O12 <sup>ii</sup>   | 0.91(4) | 1.69(4)   | 2.592(4)  | 169(4)      |
|                            | O5–H5...O7 <sup>iii</sup>   | 0.88(2) | 1.75(3)   | 2.619(4)  | 175(4)      |
|                            | O9–H9...O11 <sup>iv</sup>   | 0.87(2) | 1.77(3)   | 2.621(4)  | 168(4)      |
|                            | N1–H1B...O4 <sup>vii</sup>  | 0.86(2) | 2.06(3)   | 2.857(4)  | 156(4)      |
|                            | N1–H1C...O12 <sup>v</sup>   | 0.88(3) | 2.00(3)   | 2.862(4)  | 169(4)      |
|                            | N1–H1A...O7 <sup>vii</sup>  | 0.86(2) | 1.97(3)   | 2.807(4)  | 163(4)      |
|                            | N2–H2A...O11 <sup>vii</sup> | 0.87(2) | 2.03(3)   | 2.830(4)  | 154(4)      |
|                            | N2–H2C...O8 <sup>vi</sup>   | 0.88(2) | 1.95(3)   | 2.815(5)  | 164(4)      |
| N2–H2B...O2 <sup>vii</sup> | 0.88(2)                     | 1.99(3) | 2.841(4)  | 165(5)    |             |

Symmetry codes: (i) 1+x, y, z-1; (ii) x-1, y, 1+z; (iii) x-1, y, z; (iv) 1+x, y, z; (v) x, y, 1+z; (vi) x, y, z-1; (vii) x, y, z

| Compound                   | D–H...A                     | D–H (Å) | H...A (Å) | D...A (Å) | D–H...A (°) |
|----------------------------|-----------------------------|---------|-----------|-----------|-------------|
| L-Nva·D-Leu·2HOx           | O1–H1...O8 <sup>i</sup>     | 0.92(3) | 1.66(4)   | 2.572(5)  | 171(7)      |
|                            | O3–H3...O12 <sup>ii</sup>   | 0.92(4) | 1.67(4)   | 2.577(5)  | 170(9)      |
|                            | O5–H5...O7 <sup>iii</sup>   | 0.92(4) | 1.68(4)   | 2.599(5)  | 175(7)      |
|                            | O9–H9...O11 <sup>iv</sup>   | 0.92(3) | 1.67(4)   | 2.589(5)  | 174(7)      |
|                            | N1–H1B...O4 <sup>vii</sup>  | 0.91    | 1.95      | 2.819(6)  | 158.5       |
|                            | N1–H1C...O7 <sup>vii</sup>  | 0.91    | 1.94      | 2.814(5)  | 161.0       |
|                            | N1–H1A...O12 <sup>v</sup>   | 0.91    | 1.92      | 2.833(6)  | 176.7       |
|                            | N2–H2A...O8 <sup>vi</sup>   | 0.91    | 1.98      | 2.882(6)  | 172.7       |
|                            | N2–H2C...O11 <sup>vii</sup> | 0.91    | 1.94      | 2.822(6)  | 163.8       |
| N2–H2B...O2 <sup>vii</sup> | 0.91                        | 1.94    | 2.791(6)  | 154.3     |             |

Symmetry codes: (i) 1+x, y-1, z; (ii) x-1, 1+y, 1; (iii) x-1, y, z; (iv) 1+x, y, z; (v) x, 1+y, z; (vi) x, y-1, z; (vii) x, y, z

| Compound         | D–H...A                 | D–H (Å) | H...A (Å) | D...A (Å) | D–H...A (°) |
|------------------|-------------------------|---------|-----------|-----------|-------------|
| L-Nle·D-Leu·2HOx | O1–H1...O8 <sup>i</sup> | 0.86(3) | 1.74(3)   | 2.581(4)  | 167(6)      |

|                             |         |         |          |        |
|-----------------------------|---------|---------|----------|--------|
| O3–H3...O12 <sup>ii</sup>   | 0.85(3) | 1.73(3) | 2.575(4) | 169(7) |
| O5–H5...O7 <sup>iii</sup>   | 0.85(3) | 1.78(3) | 2.603(4) | 165(6) |
| O9–H9...O11 <sup>iv</sup>   | 0.85(3) | 1.77(3) | 2.605(4) | 167(6) |
| N1–H1B...O7 <sup>vii</sup>  | 0.98(7) | 1.85(6) | 2.786(5) | 159(5) |
| N1–H1C...O12 <sup>v</sup>   | 0.88(7) | 1.98(7) | 2.858(5) | 174(6) |
| N1–H1A...O4 <sup>vii</sup>  | 0.90(7) | 1.95(7) | 2.800(4) | 158(6) |
| N2–H2A...O8 <sup>vi</sup>   | 0.85(6) | 2.00(7) | 2.842(5) | 166(5) |
| N2–H2C...O11 <sup>vii</sup> | 0.88(7) | 1.97(7) | 2.808(5) | 160(6) |
| N2–H2B...O2 <sup>vii</sup>  | 0.90(6) | 2.01(6) | 2.806(4) | 147(6) |

Symmetry codes: (i)  $x-1, y-1, z$ ; (ii)  $1+x, 1+y, 1$ ; (iii)  $1+x, y, z$ ; (iv)  $x-1, y, z$ ; (v)  $x, 1+y, z$ ; (vi)  $x, y-1, z$ ; (vii)  $x, y, z$

### S3. DL-Nle·HOx Crystal Photograph and View of Crystal Structure

A)

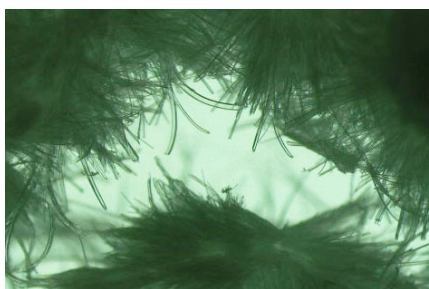

B)

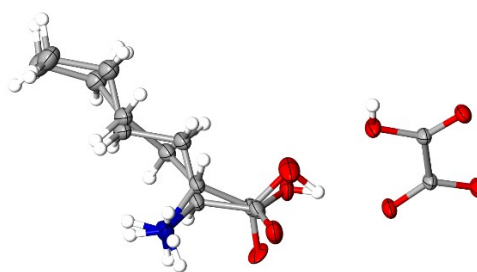

Fig. S1 DL-Nle·HOx A) crystal morphology and B) view of whole-molecule Nle disorder.

### S4. Structure Indices ( $\chi_{\text{RMS}}$ and $C_i$ )

**Conformational Assessments ( $\chi_{\text{RMS}}$ ).** Each quasiracemic hydrogen oxalate amino acid structure was processed using X-SEED<sup>2</sup> where each amino acid component was isolated, configuration inverted to L if necessary, and saved as an individual file. These structure files were then loaded into CCDC-Mercury<sup>6</sup> and processed using the structure overlay feature. Hydrogen atoms were omitted from the assessments. The initial overlay process involved matching common atoms from the core N-C(C)-CO<sub>2</sub> fragments to determine the root-mean-squared best fit value ( $\chi_{\text{RMS}}$ ). Additional overlay calculations were performed on the two molecules by including the core fragments and the next atom associated with the side chain *R* group. These sequential assessments provided a range of  $\chi_{\text{RMS}}$  values that shows the dependency of molecular conformations to chain length.

6. C. F. Macrae, I. Sovago, S. J. Cottrell, P. T. A. Galek, P. McCabe, E. Pidcock, M. Platings, G. P. Shields, J. S. Stevens, M. Towler and P. A. Wood, *J. Appl. Cryst.*, 2020, **53**, 226 – 235.

**Inversion Symmetry Assessments ( $C_i$ ).** The quasiracemic crystal structures were initially processed using X-SEED<sup>2</sup>. The hydrogen oxalate fragments, hydrogen atoms, and non-hydrogen atoms lacking an equivalent partner were omitted. Each quasienantiomeric pair was organized with the same packing motifs – *i.e.*,  $R_2^2(10)$  patterns – to provide consistent processing of the structures. A series of structure files were then generated that differed by the length of the  $R$  groups. These files containing near inversion related quasiracemate fragments and were assessed using Avnir's *Continuous Symmetry Measures* online tools.<sup>7</sup> The output from this process gave a quantitative measure ( $C_i$  values) of the degree of inversion symmetry for each structural fragment as a function of side chain length.

Table S3. Symmetry ( $C_i$  values) and Conformation ( $\chi_{\text{RMS}}$  values) Data for Quasiracemates

| Compound         | Molecular section | $\chi_{\text{RMS}}$ | $\chi_{\text{RMS}}$ | $C_i$            | $C_i$  |
|------------------|-------------------|---------------------|---------------------|------------------|--------|
|                  |                   | L-Ile·D-Leu·2HOx    | FITNIF              | L-Ile·D-Leu·2HOx | FITNIF |
| L-Ile·D-Leu·2HOx | 1                 | 0.166               | 0.100               | 0.3864           | 0.0879 |
|                  | 2                 | 0.559               | 0.169               | 1.0040           | 0.3256 |
|                  | 3                 | 0.537               | 0.285               | 0.7870           | 0.8640 |

  

| Compound         | Molecular section | $\chi_{\text{RMS}}$ | $\chi_{\text{RMS}}$ | $C_i$            | $C_i$  |
|------------------|-------------------|---------------------|---------------------|------------------|--------|
|                  |                   | L-Ile·D-Nva·2HOx    | FITJEX              | L-Ile·D-Nva·2HOx | FITJEX |
| L-Ile·D-Nva·2HOx | 1                 | 0.016               | 0.060               | 0.0060           | 0.0651 |
|                  | 2                 | 0.026               | 0.102               | 0.0065           | 0.1567 |
|                  | 3                 | 0.035               | 0.124               | 0.0096           | 0.2743 |

  

| Compound         | Molecular section | $\chi_{\text{RMS}}$ | $\chi_{\text{RMS}}$ | $C_i$            | $C_i$  |
|------------------|-------------------|---------------------|---------------------|------------------|--------|
|                  |                   | L-Nva·D-Leu·2HOx    | BERNER              | L-Nva·D-Leu·2HOx | BERNER |
| L-Nva·D-Leu·2HOx | 1                 | 0.036               | 0.017               | 0.0109           | 0.0021 |
|                  | 2                 | 0.063               | 0.018               | 0.0447           | 0.0034 |
|                  | 3                 | 0.063               | 0.023               | 0.0490           | 0.0031 |

  

| Compound         | Molecular section | $\chi_{\text{RMS}}$ | $\chi_{\text{RMS}}$ | $C_i$            | $C_i$  |
|------------------|-------------------|---------------------|---------------------|------------------|--------|
|                  |                   | L-Nle·D-Leu·2HOx    | GOLWEJ              | L-Nva·D-Leu·2HOx | GOLWEJ |
| L-Nle·D-Leu·2HOx | 1                 | 0.020               | 0.102               | 0.0050           | 0.1389 |
|                  | 2                 | 0.036               | 0.129               | 0.0178           | 0.3242 |
|                  | 3                 | 0.118               | 0.215               | 0.1146           | 0.7480 |

7. P. Alemany, D. Casanova, S. Alvarez, C. Dryzun and David Avnir, "Continuous Symmetry Measures: A New Tool in Quantum Chemistry" *Reviews in Computational Chemistry*, Volume 30, Abby L. Parrill and Kenneth B. Lipkowitz, Editors, Chapter 7, p. 289 – 352, Wiley, 2017. M. Pinsky, C. Dryzun, D. Casanova, P. Alemany and D. Avnir, *J. Comput. Chem.*, 2008, **29**, 2712 – 2721. H. Zabrodsky, S. Peleg and D. Avnir, *J. Am. Chem. Soc.*, 1992, **114**, 7843 – 7851.



## S5. Hydrogen Oxalate Cambridge Crystallographic Database (CSD) Search

The following data were generated *via* a search of the *CCDC-Cambridge Structural Database* (CSD, version 5.42, update 2) for O-H...O<sup>-</sup> hydrogen oxalate-hydrogen oxalate interactions.

Table S4. CSD Search Data for Crystal Structures Containing Hydrogen Oxalate Anions.

| REFCODE              | Frag. | OH...O<br>(°) | O...O <sup>-</sup><br>(Å) | Space<br>Group<br>Number | Space<br>Group<br>Symbol | Z' | Z  | HOx Hbond<br>Strand<br>Symm. | Primary<br>Molecule Type | Oxalate<br>stacking | HOx<br>stacking<br>distance | Stacking<br>motif |
|----------------------|-------|---------------|---------------------------|--------------------------|--------------------------|----|----|------------------------------|--------------------------|---------------------|-----------------------------|-------------------|
| <b>Current Study</b> |       |               |                           |                          |                          |    |    |                              |                          |                     |                             |                   |
| DL-Ile·HOx           | 1     | 174.9         | 2.592                     | 14                       | P21/n                    | 1  | 4  | translation                  | amino acid               | Y                   | 3.039                       | dimer             |
| DL-Leu·HOx           | 1     | 174.8         | 2.613                     | 2                        | P-1                      | 1  | 2  | translation                  | amino acid               | Y                   | 3.056                       | dimer             |
| DL-Nle·HOx           | 1     | 176           | 2.582                     | 2                        | P-1                      | 1  | 2  | translation                  | amino acid               | Y                   | 2.972                       | dimer             |
| DL-Nva·HOx           | 1     | 161.6         | 2.577                     | 2                        | P-1                      | 1  | 2  | translation                  | amino acid               | Y                   | 3.135                       | dimer             |
| L-Leu·D-Ile·2HOx     | 1     | 171           | 2.639                     | 1                        | P1                       | 1  | 1  | translation                  | amino acid               | Y                   | 3.003                       | dimer             |
|                      | 2     | 172           | 2.601                     |                          |                          |    |    |                              |                          |                     |                             |                   |
| L-Nva·D-Ile·2HOx     | 1     | 175           | 2.619                     | 1                        | P1                       | 1  | 1  | translation                  | amino acid               | Y                   | 3.145                       | dimer             |
|                      | 2     | 168           | 2.621                     |                          |                          |    |    |                              |                          |                     |                             |                   |
| L-Leu·D-Nva·2HOx     | 1     | 175           | 2.599                     | 1                        | P1                       | 1  | 1  | translation                  | amino acid               | Y                   | 3.035                       | dimer             |
|                      | 2     | 174           | 2.589                     |                          |                          |    |    |                              |                          |                     |                             |                   |
| L-Leu·D-Nle·2HOx     | 1     | 165           | 2.603                     | 1                        | P1                       | 1  | 1  | translation                  | amino acid               | Y                   | 3.080                       | dimer             |
|                      | 2     | 167           | 2.605                     |                          |                          |    |    |                              |                          |                     |                             |                   |
| <b>CSD Entries</b>   |       |               |                           |                          |                          |    |    |                              |                          |                     |                             |                   |
| LOSHUZ               | 1     | 174.733       | 2.459                     | 2                        | P-1                      | 1  | 2  | translation                  | quat amine               | Y                   | 4.238                       | dimer             |
| ZOZMOT               | 1     | 174.75        | 2.545                     | 2                        | P-1                      | 1  | 2  | translation                  | triazolium               | Y                   | 3.093                       | dimer             |
| ACOQER               | 1     | 171.139       | 2.587                     | 14                       | P21/n                    | 1  | 4  | translation                  | amino acid               | Y                   | 3.295                       | dimer             |
| AFIVAO01             | 1     | 175.526       | 2.596                     | 148                      | R-3                      | 1  | 18 | 31 screw                     | triazolium               | Y                   | 3.109                       | dimer             |
| AHOXLH02             | 1     | 160.958       | 2.553                     | 14                       | P21/n                    | 2  | 8  | n glide                      | quat amine               | Y                   | 3.115                       | inf               |
| AHOKLH02             |       | 172.38        | 2.557                     |                          |                          |    |    | n glide                      |                          | Y                   | 3.267                       |                   |
| AHOXLH03             | 1     | 176.92        | 2.563                     | 62                       | Pnma                     | 1  | 8  | n glide                      | quat amine               | Y                   | 3.021                       | Inf               |

|          |   |         |       |    |       |     |    |             |             |   |       |       |
|----------|---|---------|-------|----|-------|-----|----|-------------|-------------|---|-------|-------|
| AJUMOH   | 1 | 178.034 | 2.558 | 15 | C2/c  | 1   | 8  | translation | quat amine  | Y | 3.135 | dimer |
| AMTBUB   | 1 | 167.235 | 2.507 | 2  | P-1   | 1   | 2  | translation | amino acid  | N |       |       |
| ARAHEG   | 1 | 166.873 | 2.562 | 14 | P21/n | 1   | 4  | 21 screw    | quat amine  | N |       |       |
| BASZUT   | 1 | 171.359 | 2.651 | 4  | P21   | 1   | 2  | 21 screw    | quat amine  | N |       |       |
| BEJLAG   | 1 | 178.772 | 2.468 | 14 | P21/c | 1   | 4  | translation | quat. amine | N |       |       |
| BEZCOY   | 1 | 151.766 | 2.461 | 14 | P21/c | 1   | 4  | translation | quat. amine | N |       |       |
| BOBQAK   | 1 | 179.797 | 2.483 | 43 | Fdd2  | 1   | 16 | translation | quat amine  | N |       |       |
| CABZAJ   | 1 | 168.706 | 2.522 | 14 | P21/c | 1   | 4  | c glide     | quat amine  | N |       |       |
| CIGQIV   | 1 | 174.377 | 2.502 | 14 | P21/c | 1   | 4  | translation | quat amine  | N |       |       |
| CIKNUI01 | 1 | 173.183 | 2.587 | 14 | P21/c | 1   | 4  | translation | quat amine  | N |       |       |
| CIRXEH   | 1 | 177.652 | 2.532 | 4  | P21   | 1   | 2  | translation | quat amine  | Y | 3.162 | inf   |
| CITSED10 | 1 | 171.81  | 2.471 | 7  | Pc    | 2   | 4  | translation | quat amine  | Y | 2.975 | inf   |
| CITSED10 | 2 | 173.46  | 2.514 |    |       |     |    | translation |             | N |       |       |
| CONGAP   | 1 | 171.182 | 2.573 | 2  | P-1   | 1   | 2  | translation | quat amine  | N |       |       |
| COSDUK   | 1 | 171.511 | 2.583 | 14 | P21/c | 1   | 4  | translation | pyridinium  | Y | 2.983 | inf   |
| DAQXOJ   | 1 | 171.415 | 2.539 | 14 | P21/c | 0.5 | 2  | c glide     | quat amine  | N |       |       |
| DMAHOX   | 1 | 176.952 | 2.533 | 14 | P21/c | 1   | 4  | translation | quat amine  | Y | 3.127 | dimer |
| DUJKOK   | 1 | 169.43  | 2.537 | 1  | P1    | 2   | 2  | translation | quat amine  | Y | 3.030 | dimer |
| DUJKOK   | 2 | 168.563 | 2.538 | 1  | P1    |     | 2  | translation |             | N |       |       |
| DUJKOK   | 3 | 157.247 | 2.552 | 1  | P1    |     | 2  | translation |             | N |       |       |
| DUJKOK   | 4 | 169.023 | 2.556 | 1  | P1    |     | 2  | translation |             | N |       |       |
| EGOPAS   | 1 | 151.07  | 2.51  | 4  | P21   | 2   | 4  | 21 screw    | quat amine  | N |       |       |
| EMUDAS   | 1 | 171.633 | 2.554 | 2  | P-1   | 2   | 4  | translation | quat amine  | Y | 3.167 | inf   |
| EMUDAS   | 2 | 170.255 | 2.561 | 2  | P-1   |     | 4  | translation |             | N |       |       |
| EVEPIF   | 1 | 171.866 | 2.579 | 2  | P-1   | 1   | 2  | translation | imidizolium | N |       |       |
| FAHQUB   | 1 | 173.405 | 2.584 | 4  | P21   | 2   | 4  | translation | quat amine  | Y | 3.066 | dimer |
| FAYFAN   | 1 | 175.772 | 2.699 | 15 | C2/c  | 0.5 | 4  | c glide     | pyridinium  | Y | 3.204 | inf   |
| FIBCUR   | 1 | 172.978 | 2.469 | 61 | Pbca  | 1   | 8  | translation | quat amine  | N |       |       |
| FOMBIU   | 1 | 171.954 | 2.548 | 15 | C2/c  | 1   | 8  | translation | quat amine  | Y | 3.142 | dimer |
| FOSJOP   | 1 | 173.959 | 2.582 | 2  | P-1   | 1   | 2  | translation | quat amine  | Y | 3.260 | dimer |

|          |   |         |       |    |         |     |   |             |             |   |       |       |
|----------|---|---------|-------|----|---------|-----|---|-------------|-------------|---|-------|-------|
| GALMIS   | 1 | 166.594 | 2.508 | 14 | P21/c   | 1   | 4 | c glide     | pyridinium  | N |       |       |
| GENQOG01 | 1 | 175.741 | 2.584 | 15 | C2/c    | 1   | 8 | translation | quat amine  | N |       |       |
| GOLDES   | 1 | 179.095 | 2.556 | 15 | C2/c    | 1   | 8 | translation | quat amine  | Y | 3.115 | dimer |
| GUSKAH   | 1 | 170.172 | 2.453 | 4  | P21     | 2   | 4 | translation | quat amine  | N |       |       |
| GUSKAH   | 2 | 176.12  | 2.487 |    |         |     |   | translation |             | N |       |       |
| GUWPOF   | 1 | 153.587 | 2.573 | 14 | P21/n   | 1   | 4 | n glide     | quat amine  | N |       |       |
| HAGZUL   | 1 | 172.668 | 2.577 | 1  | P1      | 2   | 2 | translation | amino acid  | Y | 3.142 | dimer |
| HAGZUL   | 2 | 177.061 | 2.617 | 1  | P1      |     | 2 | translation |             | N |       |       |
| HIQXUD   | 1 | 176.388 | 2.546 | 14 | P21/c   | 1   | 4 | translation | imidazolium | N |       |       |
| HOVFEF   | 1 | 170.519 | 2.567 | 4  | P21     | 1   | 2 | 21 screw    | imidazolium | N |       |       |
| HUZQEA   | 1 | 173.858 | 2.503 | 4  | P21     | 1   | 2 | translation | quat amine  | N |       |       |
| IMEGIR18 | 1 | 175.448 | 2.566 | 14 | P21/c   | 1   | 4 | c glide     | amino acid  | Y | 2.986 | inf   |
| JAZROU   | 1 | 173.532 | 2.508 | 29 | Pca21   | 2   | 8 | a glide     | quat amine  | N |       |       |
| JAZROU   | 2 | 172.043 | 2.550 | 29 | Pca21   |     | 8 | a glide     |             | N |       |       |
| KAKYIH   | 1 | 170.295 | 2.472 | 4  | P21     | 1   | 2 | 21 screw    | quat amine  | N |       |       |
| KHOXAL11 | 1 | 173.818 | 2.523 | 14 | P21/c   | 1   | 4 | c glide     | K+          | Y | 2.780 | inf   |
| KIGJUG   | 1 | 173.404 | 2.559 | 62 | Pnma    | 1   | 8 | n glide     | H3O+        | Y | 3.025 | inf   |
| KUDWEN   | 1 | 174.027 | 2.564 | 2  | P-1     | 1   | 2 | translation | quat amine  | Y | 3.108 | dimer |
| LARXAG   | 1 | 175.515 | 2.465 | 18 | P21212  | 0.5 | 2 | translation | quat amine  | Y | 3.306 | dimer |
| LHOXAL01 | 1 | 171.016 | 2.490 | 1  | P1      | 1   | 1 | translation | Li+         | Y | 2.947 | inf   |
| LOCLOF   | 1 | 172.414 | 2.535 | 19 | P212121 | 1   | 4 | 21 screw    | amino acid  | N |       |       |
| MAMHOX   | 1 | 174.476 | 2.515 | 14 | P21/n   | 1   | 4 | n glide     | quat amine  | Y | 3.520 | inf   |
| MEQPAZ02 | 1 | 174.792 | 2.590 | 14 | P21/n   | 1   | 4 | translation | imidazolium | Y | 3.207 | inf   |
| MIFRAU   | 1 | 172.156 | 2.610 | 15 | C2/c    | 1   | 8 | translation | amino acid, | Y | 3.303 | dimer |
| MIKXEK   | 1 | 175.12  | 2.589 | 19 | P212121 | 1   | 4 | 21 screw    | quat amine  | N |       |       |
| MOHDIX   | 1 | 169.427 | 2.608 | 19 | P212121 | 1   | 4 | translation | amino acid  | Y | 2.970 | dimer |
| MOSNAK01 | 1 | 173.504 | 2.627 | 15 | C2/c    | 1   | 8 | translation | pyridinium  | Y | 3.099 | dimer |
| NELPUP   | 1 | 173.955 | 2.587 | 14 | P21/n   | 1   | 4 | translation | amino acid  | Y | 3.063 | inf   |
| NHOXAL06 | 1 | 175.475 | 2.567 | 2  | P-1     | 1   | 2 | translation | Na+         | Y | 3.068 | inf   |
| NORGEH   | 1 | 171.146 | 2.632 | 33 | Pna21   | 1   | 4 | 21 screw    | pyridinium  | N |       |       |

|          |   |         |       |    |         |     |    |             |            |   |       |       |
|----------|---|---------|-------|----|---------|-----|----|-------------|------------|---|-------|-------|
| NOSXAU   | 1 | 164.511 | 2.578 | 14 | P21/c   | 1   | 4  | c glide     | amino acid | N |       |       |
| NUZQOO   | 1 | 166.594 | 2.585 | 33 | Pbn21   | 1   | 4  | translation | quat amine | Y | 3.609 | inf   |
| OJITEH   | 1 | 173.134 | 2.516 | 2  | P-1     | 1   | 2  | translation | quat amine | Y | 3.945 | dimer |
| OKAVED   | 1 | 176.266 | 2.463 | 14 | P21/n   | 2   | 8  | translation | quat amine | N |       |       |
| OKAVED   | 2 | 171.08  | 2.589 | 14 | P21/n   |     | 8  | translation |            | N |       |       |
| PAVQEK   | 1 | 178.379 | 2.559 | 13 | P2/c    | 1   | 4  | translation | quat amine | Y | 3.104 | dimer |
| PEPMOM01 | 1 | 173.233 | 2.578 | 15 | C2/c    | 0.5 | 4  | translation | quat amine | N |       |       |
| PEPQEG   | 1 | 175.509 | 2.573 | 56 | Pccn    | 0.5 | 4  | translation | quat amine | Y | 3.454 | inf   |
| PEPQEG01 | 1 | 174.233 | 2.550 | 18 | P21212  | 0.5 | 2  | translation | quat amine | N |       |       |
| PEXCIH   | 1 | 173.919 | 2.536 | 19 | P212121 | 1   | 4  | 21 screw    | quat amine | N |       |       |
| PONSAO   | 1 | 175.296 | 2.562 | 15 | C2/c    | 1   | 8  | translation | quat amine | Y | 3.156 | dimer |
| QIGCEO02 | 1 | 174.076 | 2.544 | 15 | C2/c    | 0.5 | 4  | translation | quat amine | Y | 3.026 | dimer |
| QIQKEI   | 1 | 174.14  | 2.495 | 4  | P21     | 2   | 4  | translation | quat amine | Y | 4.192 | dimer |
| QIQKEI   | 1 | 171.91  | 2.503 |    |         |     |    | translation |            | N |       |       |
| QIQKOS   | 1 | 178.796 | 2.636 | 14 | P21/n   | 1   | 4  | translation | quat amine | Y | 3.411 | dimer |
| QOCCUI   | 1 | 169.97  | 2.449 | 2  | P-1     | 1   | 2  | translation | pyridinium | Y | 2.860 | dimer |
| RIDNUQ03 | 1 | 165.47  | 2.510 | 14 | P21/n   | 1   | 4  | translation | quat amine | N |       |       |
| ROBXYOY  | 1 | 168.997 | 2.607 | 15 | C2/c    | 1   | 8  | translation | quat amine | Y | 3.061 | dimer |
| SANQUU   | 1 | 167.376 | 2.526 | 14 | P21/c   | 1   | 4  | translation | quat amine | N |       |       |
| SEBZAD   | 1 | 162.402 | 2.625 | 61 | Pbca    | 1   | 8  | c glide     | quat amine | N |       |       |
| TAMFIZ   | 1 | 160.083 | 2.473 | 1  | P1      | 2   | 2  | translation | quat amine | N |       |       |
| TAMFIZ   | 2 | 168.206 | 2.478 | 1  | P1      |     | 2  | translation |            | N |       |       |
| TERSEP   | 1 | 176.694 | 2.473 | 14 | P21/n   | 1   | 4  | translation | quat amine | Y | 3.262 | dimer |
| TMAHOX   | 1 | 175.167 | 2.489 | 11 | P21/m   | 0.5 | 2  | translation | quat amine | N |       |       |
| TODDUN   | 1 | 166.9   | 2.524 | 15 | C2/c    | 1   | 8  | translation | quat amine | Y | 2.844 | dimer |
| TODDUN   | 2 | 169.368 | 2.547 | 15 | C2/c    | 1   | 8  | translation |            | Y | 3.152 |       |
| TOQGUD   | 1 | 174.111 | 2.606 | 4  | P21     | 1   | 2  | 21 screw    | pyridinium | N |       |       |
| VEHGEU   | 1 | 170.495 | 2.616 | 14 | P21/c   | 1   | 4  | c glide     | quat amine | N |       |       |
| VURYEN   | 1 | 162.55  | 2.462 | 9  | Cc      | 4   | 16 | translation | quat amine | N |       |       |
| VURYEN   | 2 | 147.16  | 2.462 |    |         |     |    | translation |            | N |       |       |

|        |   |         |       |    |         |   |   |             |             |   |       |       |
|--------|---|---------|-------|----|---------|---|---|-------------|-------------|---|-------|-------|
| VURYEN | 3 | 170.06  | 2.462 |    |         |   |   | translation |             | N |       |       |
| VURYEN | 4 | 156.44  | 2.462 |    |         |   |   | translation |             | N |       |       |
| WACZEG | 1 | 171.432 | 2.611 | 14 | P21/n   | 1 | 4 | 21 screw    | quat amine  | N |       |       |
| WIFHUR | 1 | 175.82  | 2.642 | 9  | la      | 1 | 4 | a glide     | quat amine  | N |       |       |
| WIFJON | 1 | 174.52  | 2.549 | 14 | P21/c   | 1 | 4 | c glide     | quat amine  | N |       |       |
| WIPQOE | 1 | 176.162 | 2.632 | 2  | P-1     | 1 | 2 | translation | amino acid  | Y | 3.107 | dimer |
| WIZBEN | 1 | 177.601 | 2.468 | 15 | C2/c    | 1 | 8 | translation | quat amine  | N |       |       |
| WIZBOX | 1 | 159.624 | 2.480 | 29 | Pca21   | 2 | 8 | c glide     | quat amine  | N |       |       |
| WIZBOX | 2 | 166.69  | 2.486 |    |         |   |   | c glide     |             | N |       |       |
| WOVYOV | 1 | 176.954 | 2.54  | 14 | P21/c   | 1 | 4 | translation | amino acid  | Y | 2.943 | dimer |
| XANSOW | 1 | 172.691 | 2.641 | 4  | P21     | 1 | 2 | translation | quat amine  | N |       |       |
| XIZPEE | 1 | 169.603 | 2.549 | 2  | P-1     | 2 | 4 | translation | quat amine  | Y | 3.880 | dimer |
| XIZPEE | 2 | 171.474 | 2.565 | 2  | P-1     |   | 4 | translation |             | Y | 3.634 |       |
| XOCGOO | 1 | 169.902 | 2.517 | 14 | P21/c   | 1 | 4 | translation | imidazolium | N |       |       |
| XUJNOH | 1 | 175.692 | 2.587 | 19 | P212121 | 1 | 4 | translation | quat amine  | Y | 3.208 | inf   |
| YEJYIV | 1 | 171.553 | 2.545 | 19 | P212121 | 1 | 4 | translation | amino acid  | Y | 3.894 | inf   |
| YEPBEB | 1 | 166.39  | 2.661 | 4  | P21     | 1 | 2 | translation | quat amine  | N |       |       |
| YIRGUE | 1 | 170.791 | 2.553 | 2  | P-1     | 2 | 4 | translation | pyridinium  | N |       |       |
| ZAQJEI | 1 | 174.776 | 2.492 | 2  | P-1     | 1 | 2 | translation | pyridinium  | Y | 3.719 | dimer |
| ZENZUN | 1 | 172.725 | 2.520 | 2  | P-1     | 1 | 2 | translation | quat amine  | N |       |       |
